# Supplementary material
Source: MDPI journal article supplement (https://www.mdpi.com/2071-1050/13/4/2365)
Supplement: s1 [file s1]

Supplement A

1

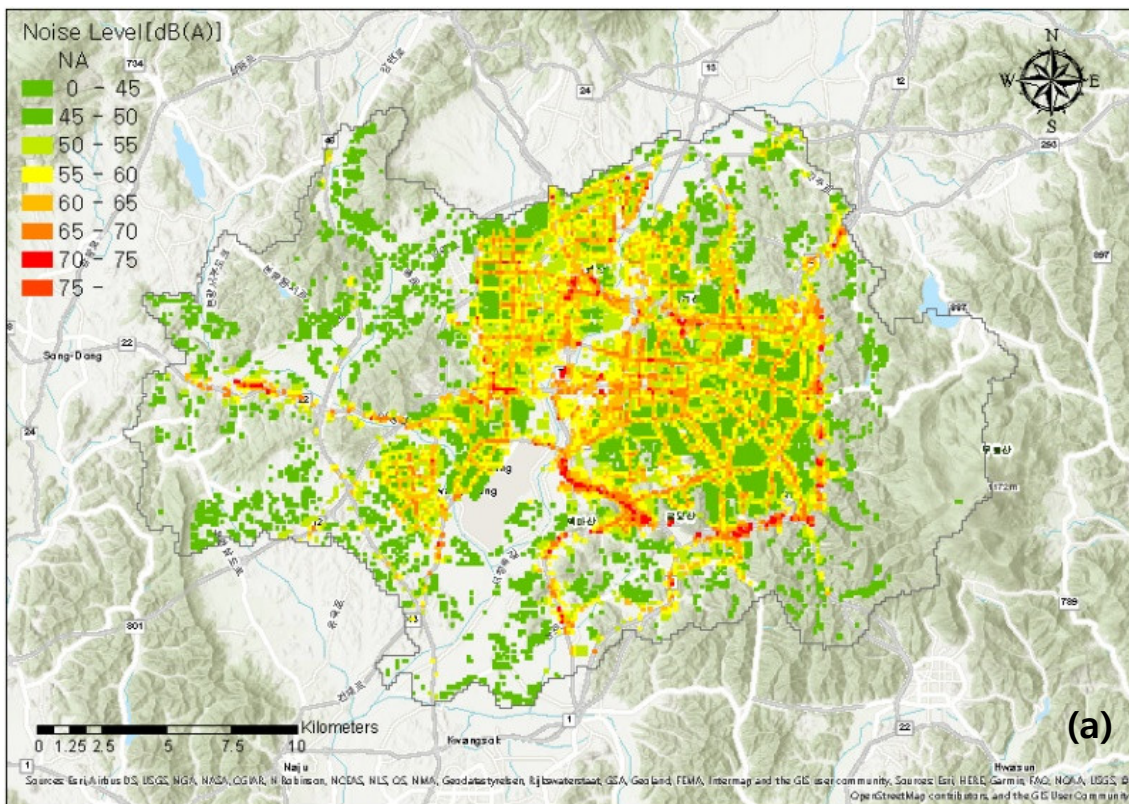

2

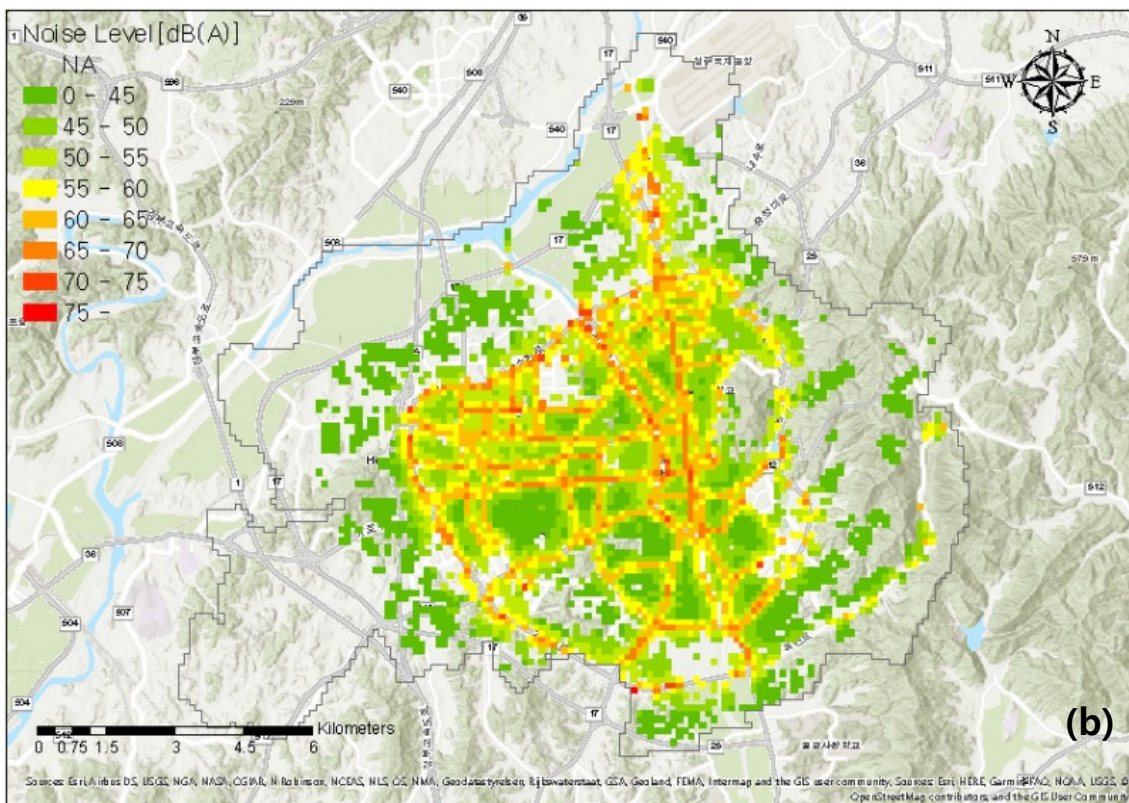

3

Figure S1. Grid maps of representative values for road-traffic noise level in: (a) Gwangju; (b) Cheongju [44-45].

4



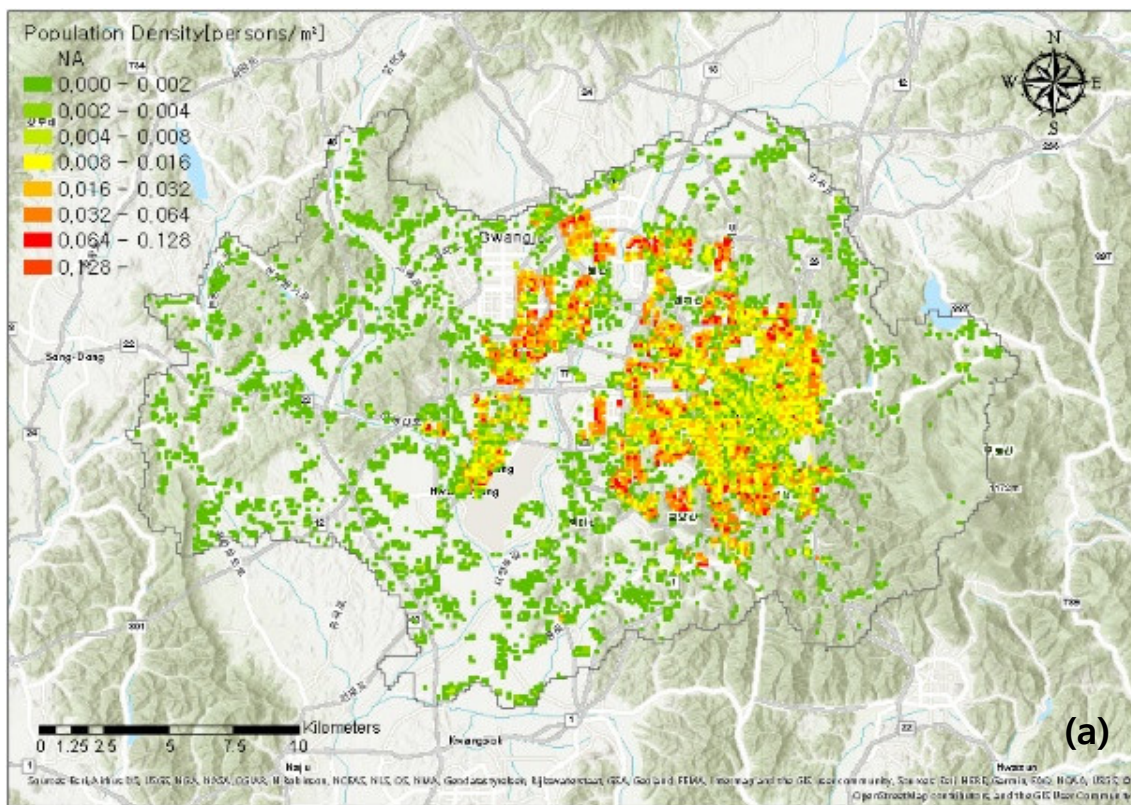

5

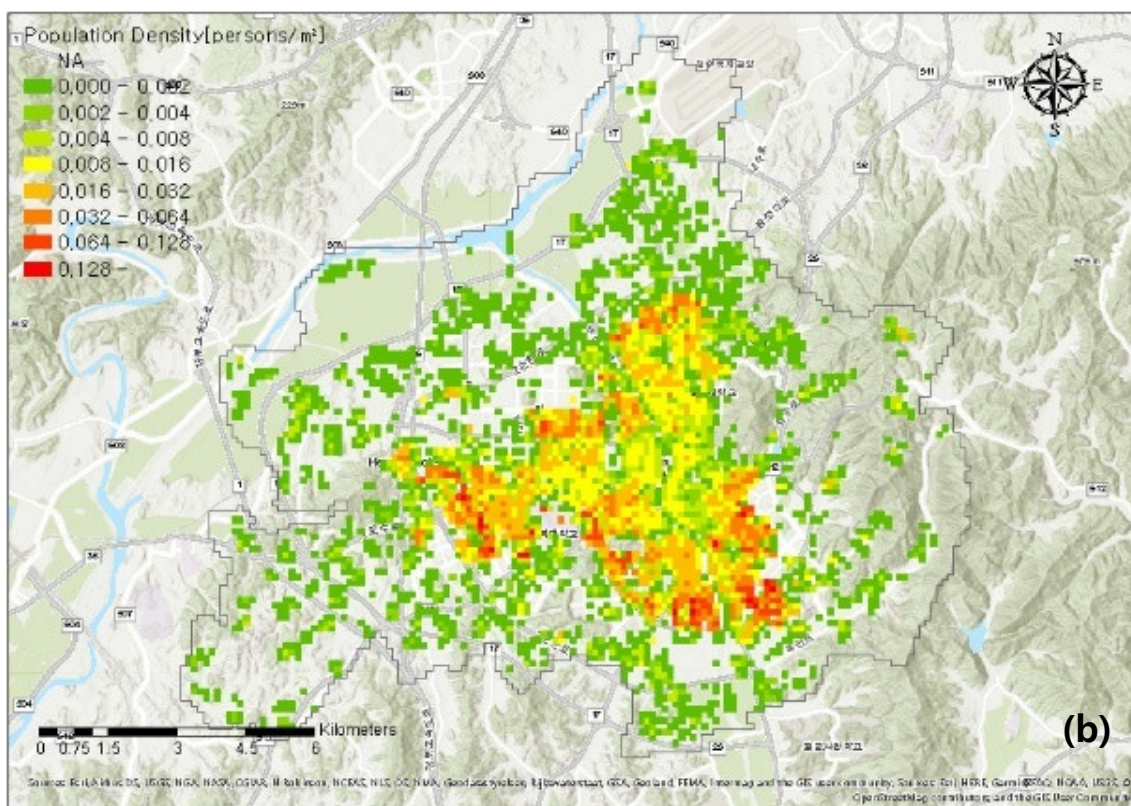

6

Figure S2. Grid maps of representative values for population density in: (a) Gwangju; (b) Cheongju [44-45].

7

8



9  
10

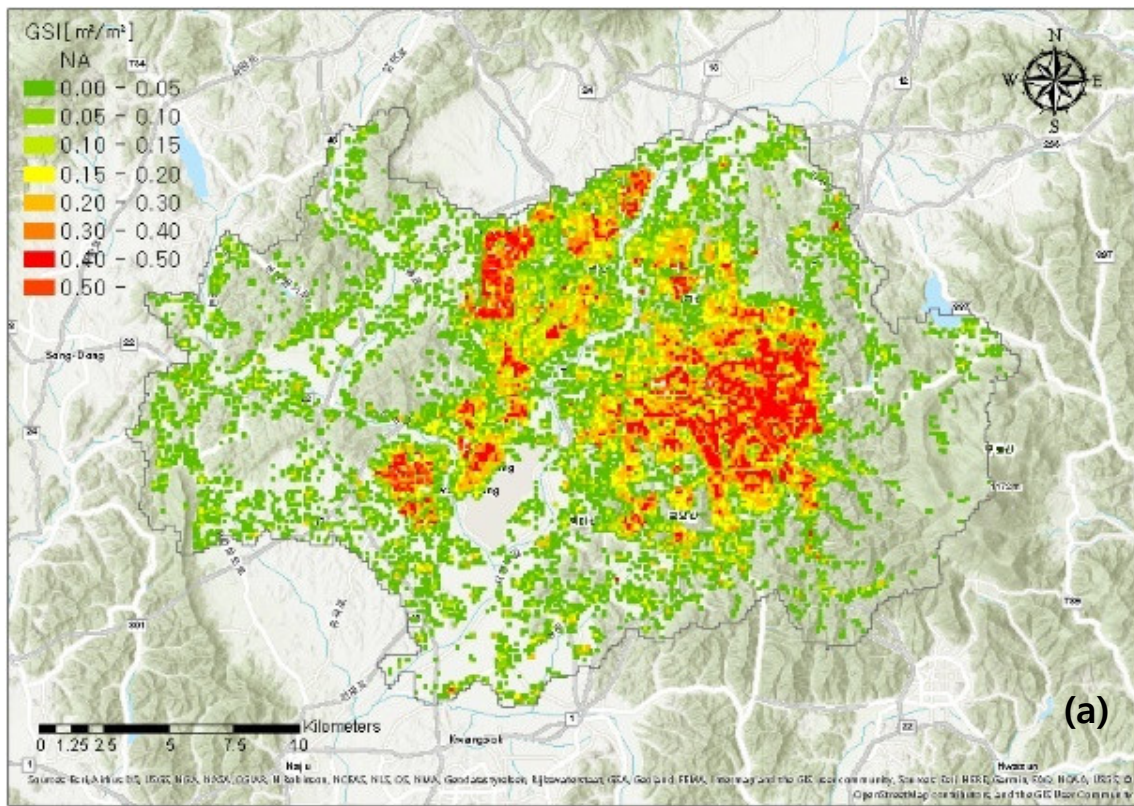

11

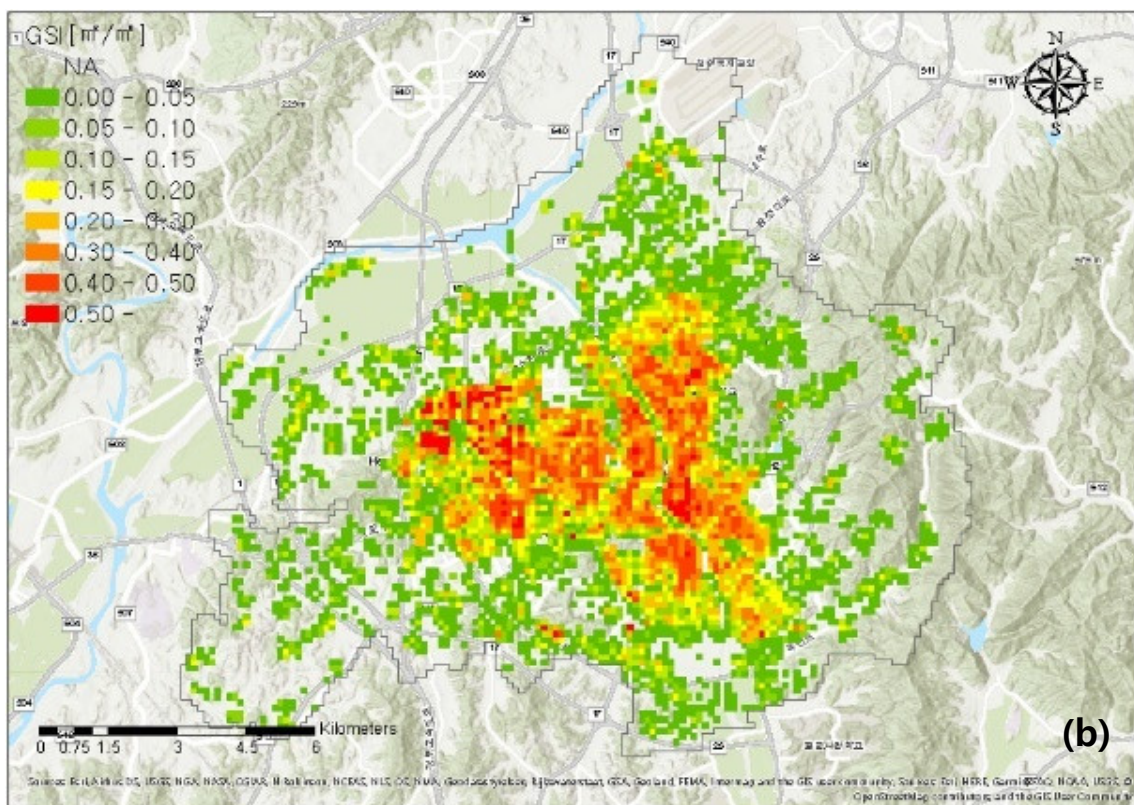

12  
13

Figure S3. Grid maps of representative values for ground space index in: (a) Gwangju; (b) Cheongju [44-45].



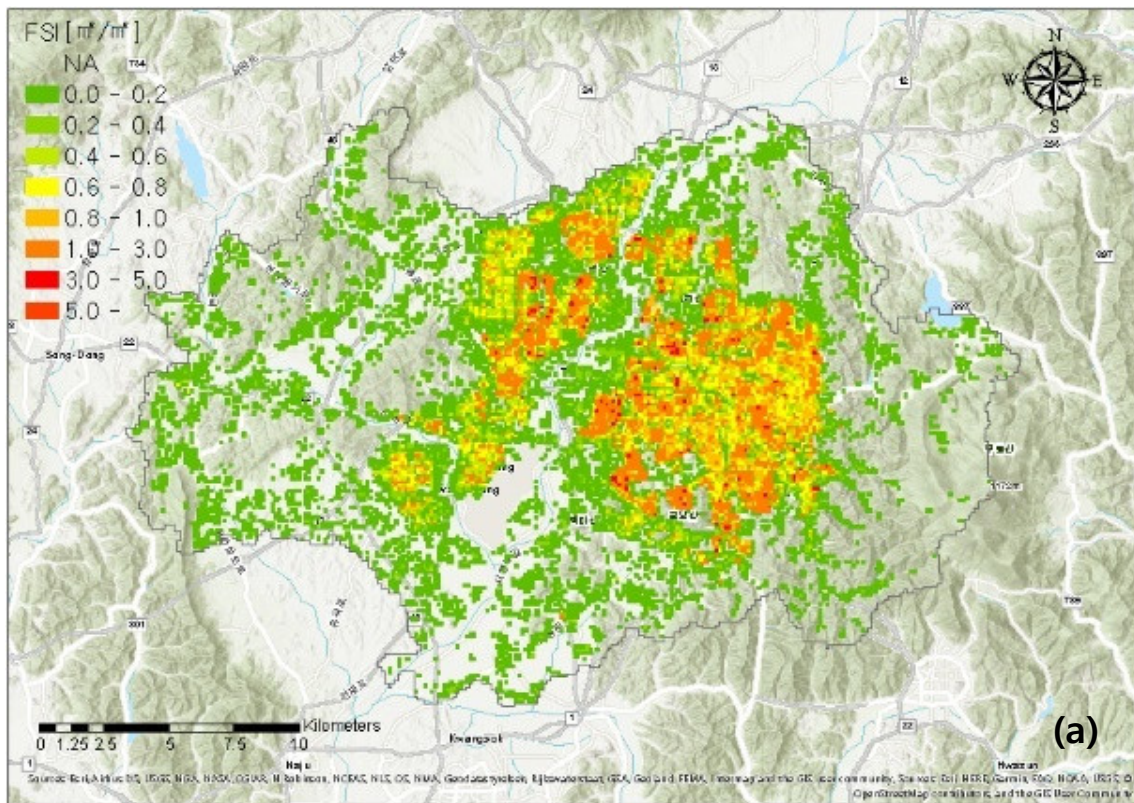

14

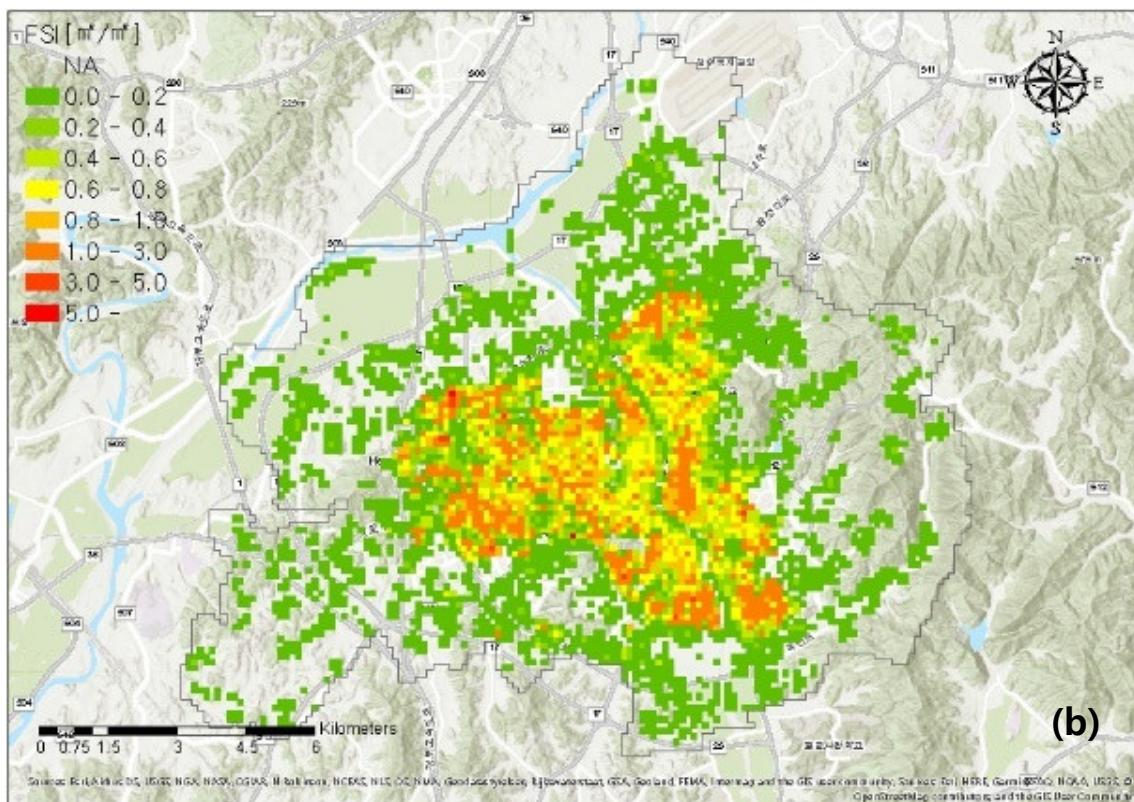

15

Figure S4. Grid maps of representative values for floor space index in: (a) Gwangju; (b) Cheongju [44-45].

16



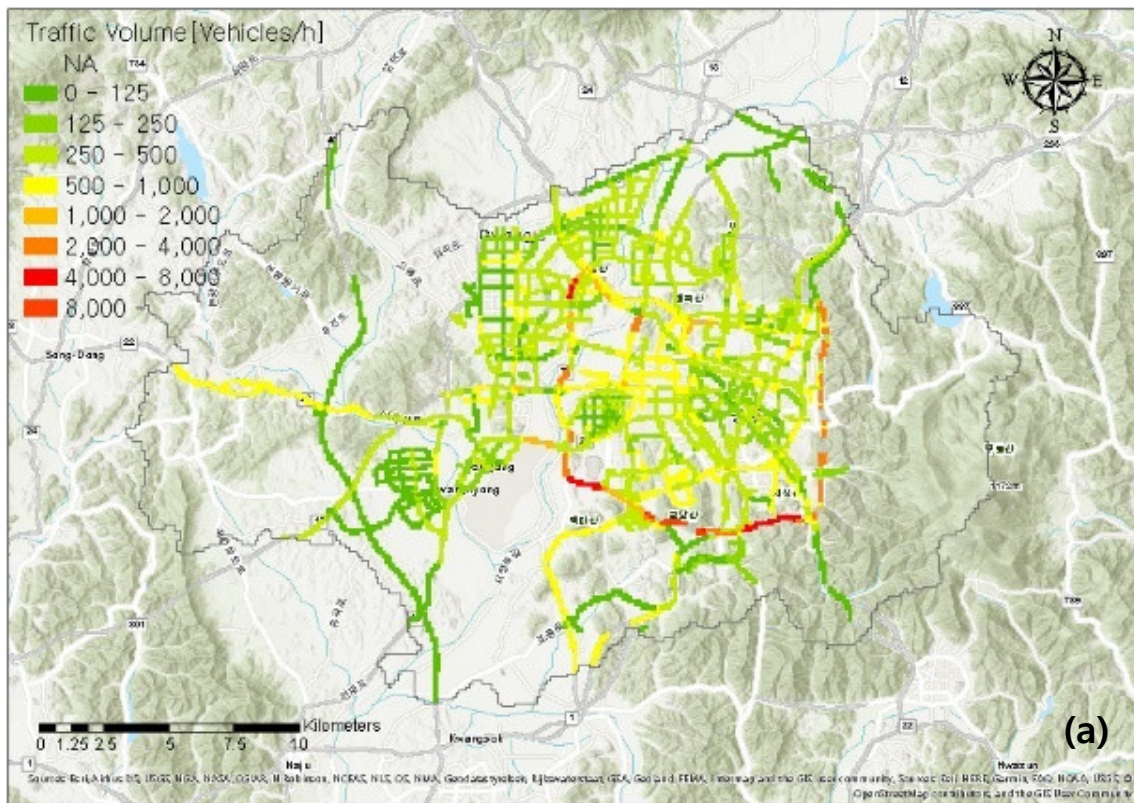

17

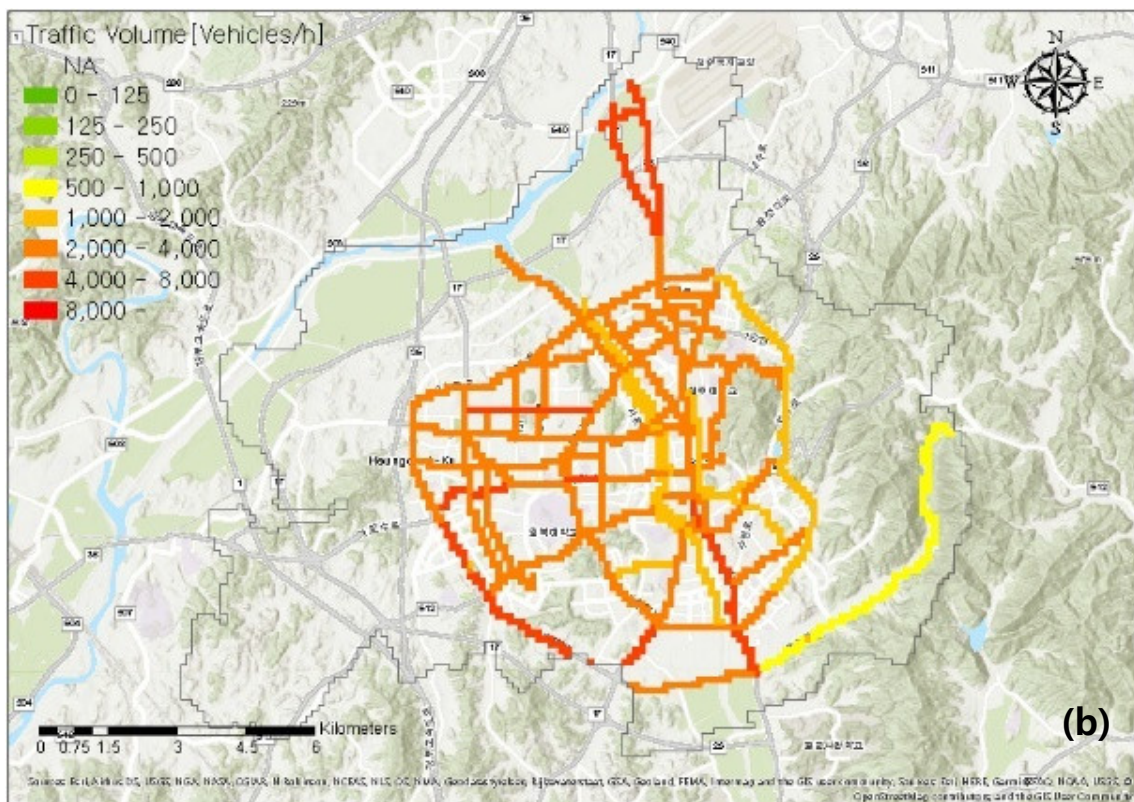

18

Figure S5. Grid maps of representative values for traffic volume in: (a) Gwangju; (b) Cheongju [44-45].

19



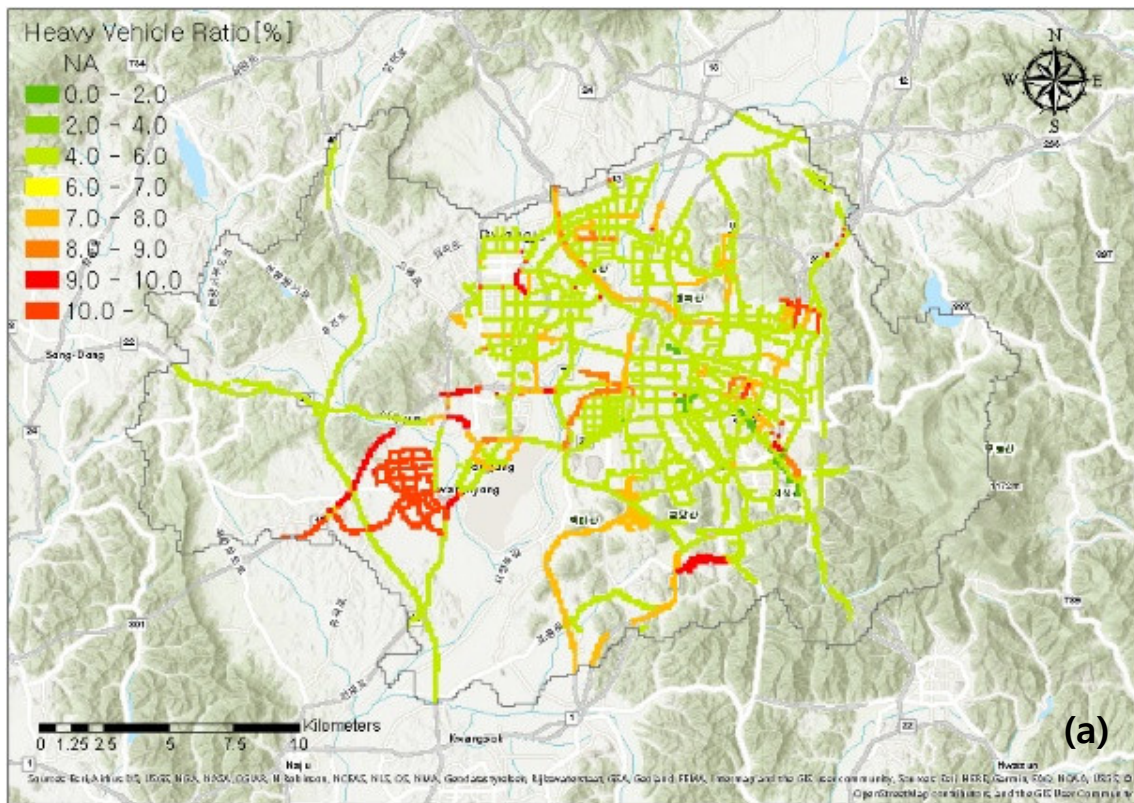

20

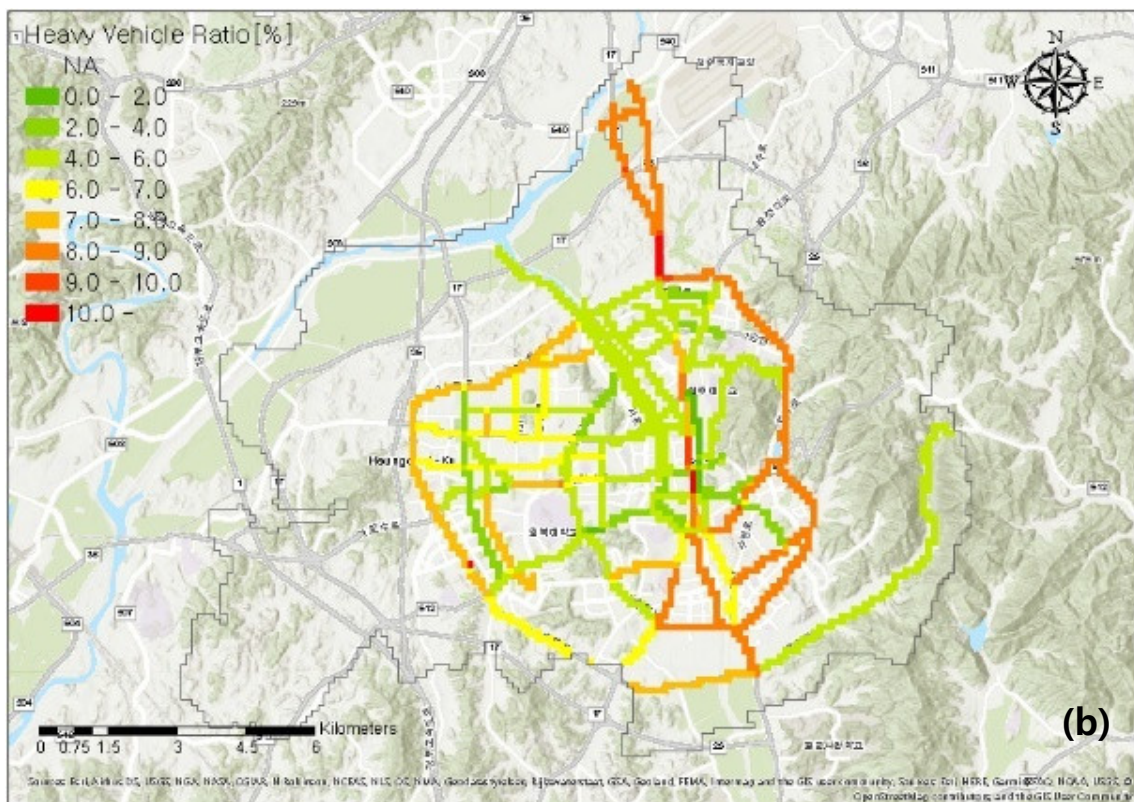

21

Figure S6. Grid maps of representative values for heavy vehicle ratio in: (a) Gwangju; (b) Cheongju [44-45].

22



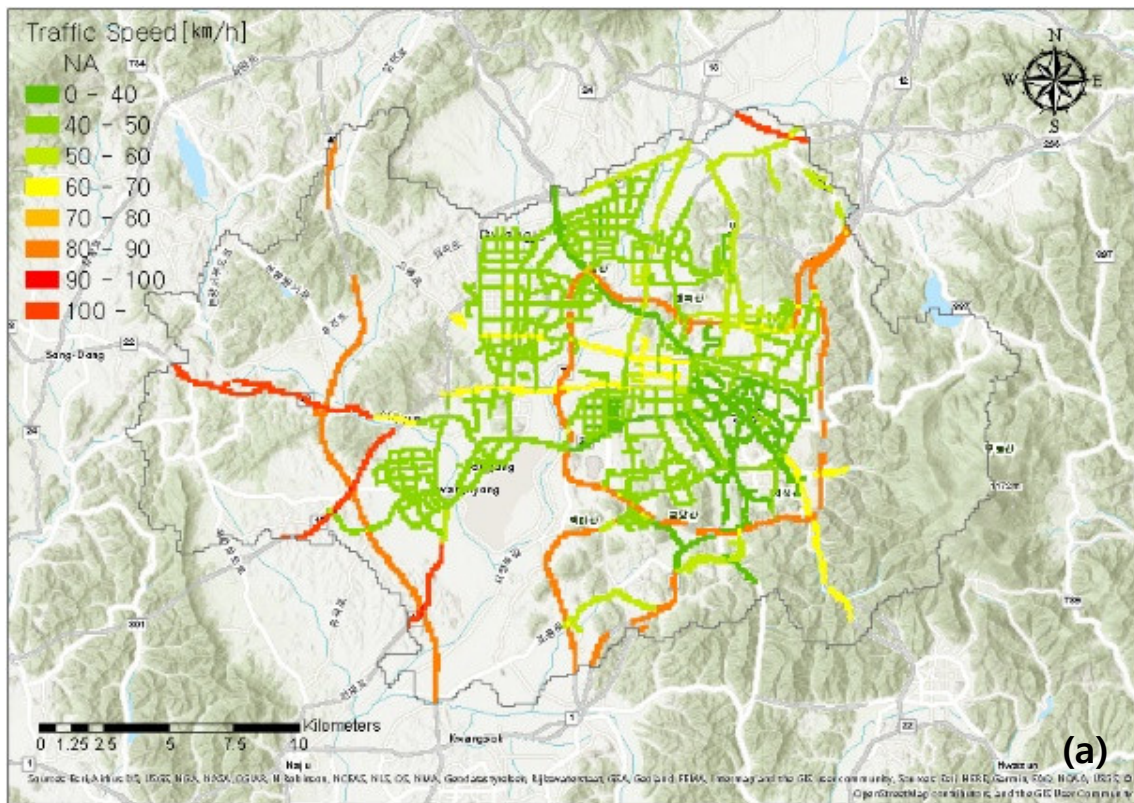

23

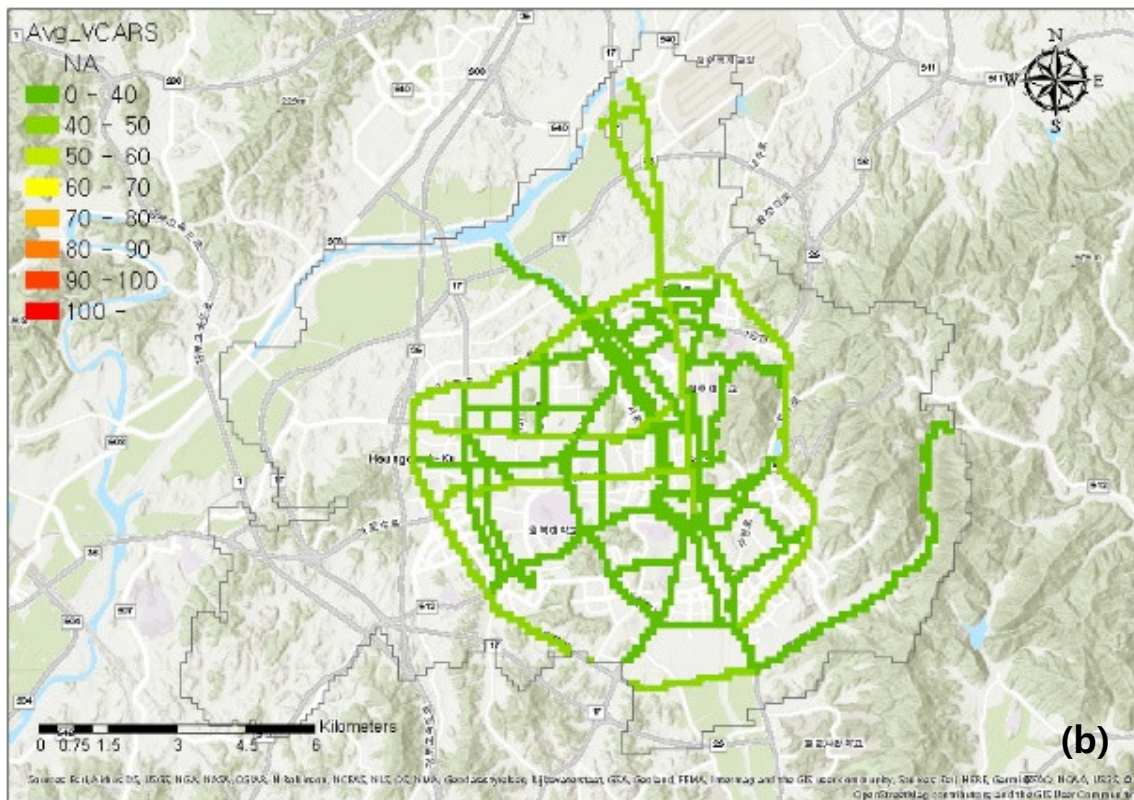

24

Figure S7. Grid maps of representative values for traffic speed in: (a) Gwangju; (b) Cheongju.

25



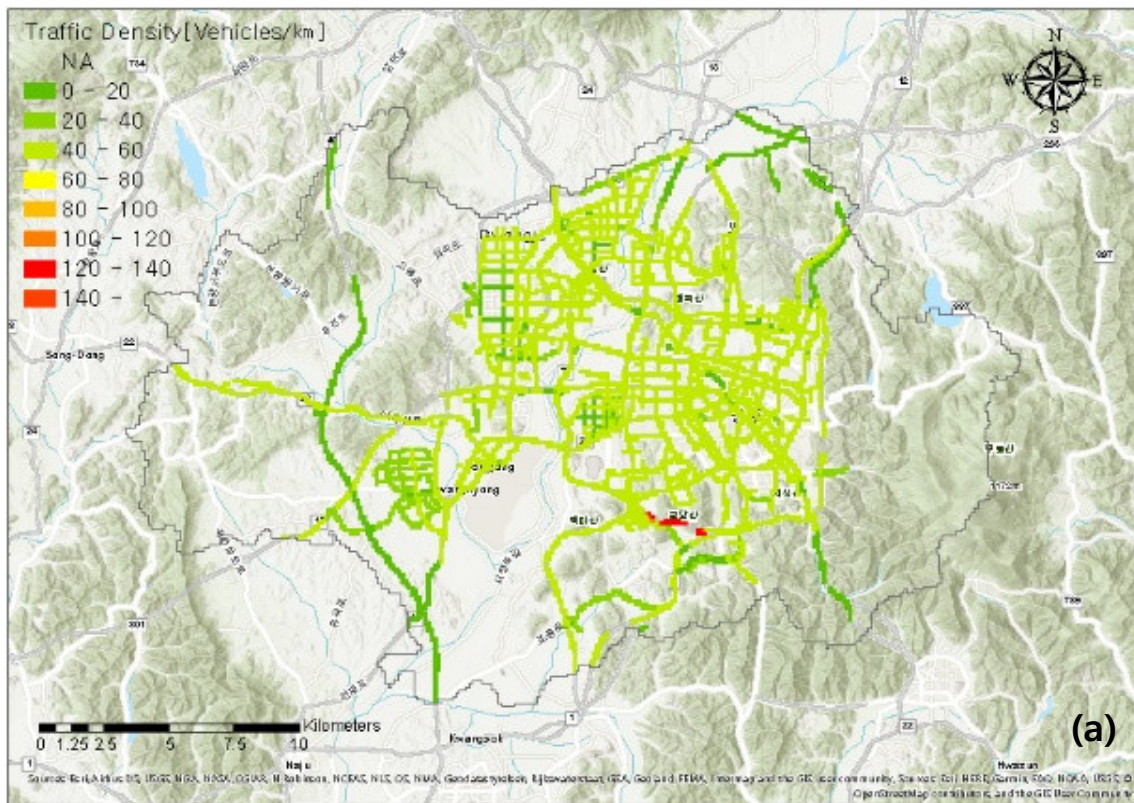

26

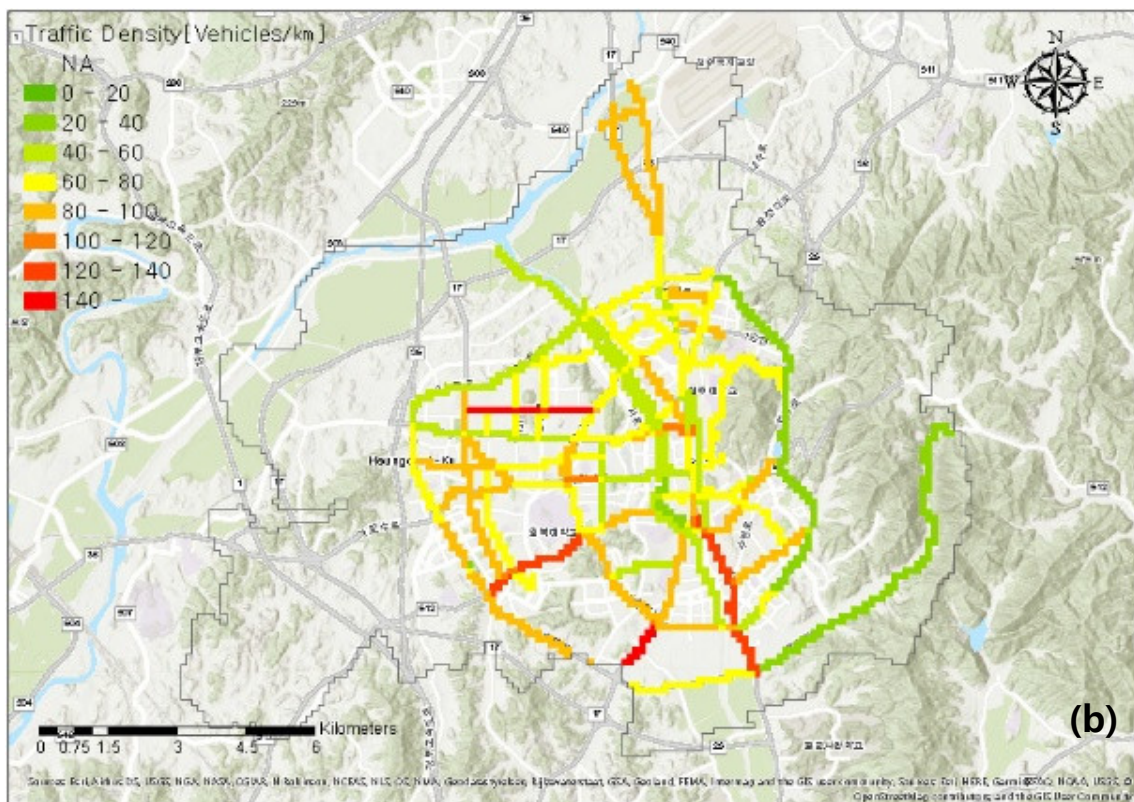

27

Figure S8. Grid maps of representative values for traffic density in: (a) Gwangju; (b) Cheongju.

28



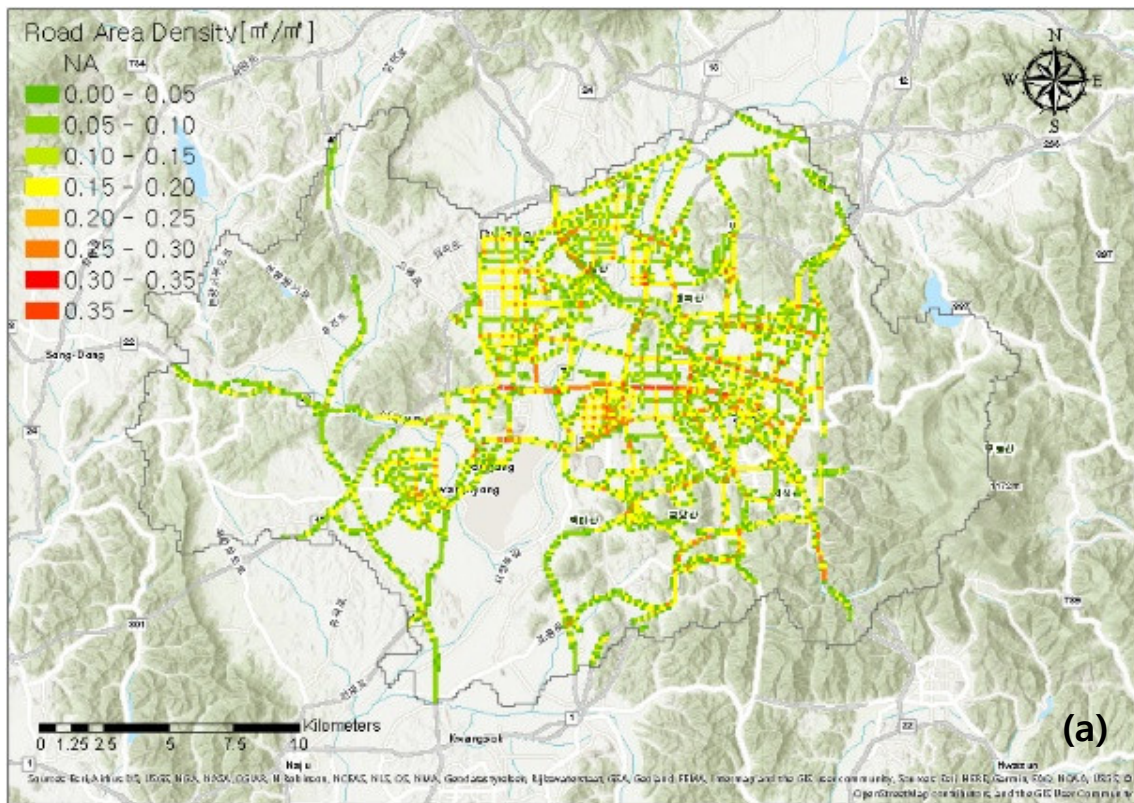

29

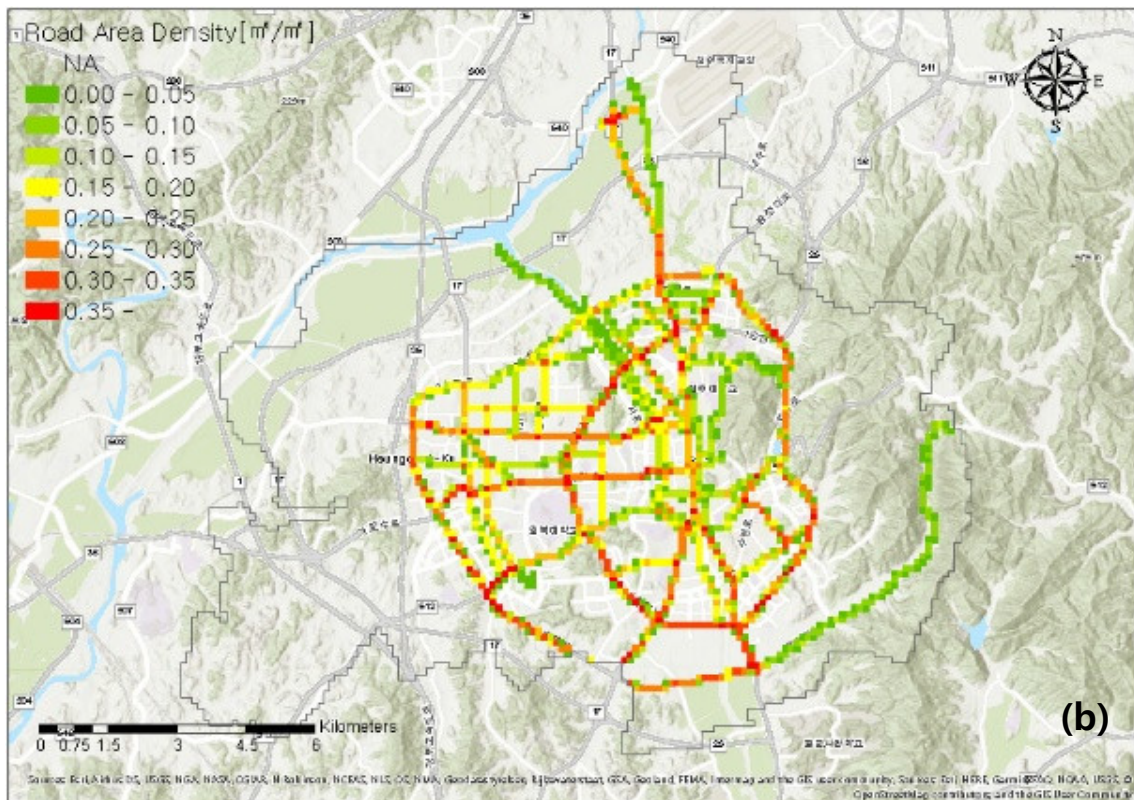

30

Figure S9. Grid maps of representative values for road area density in: (a) Gwangju; (b) Cheongju [44-45].

31



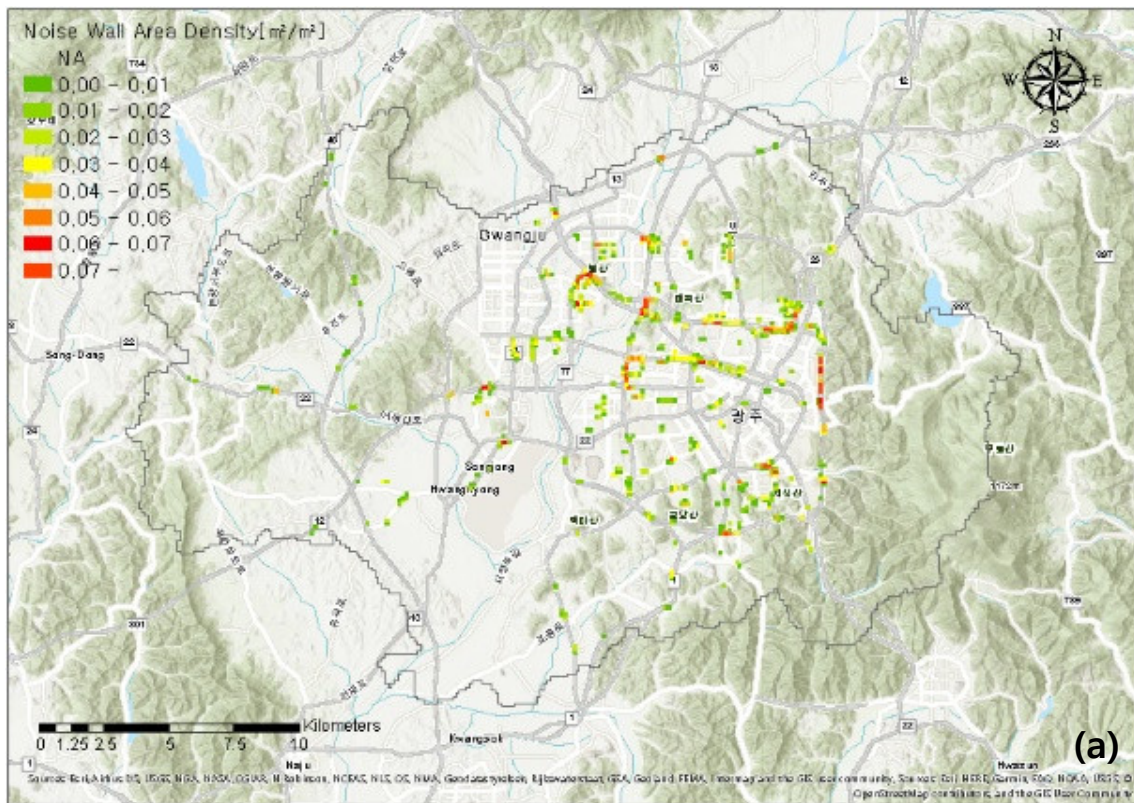

32

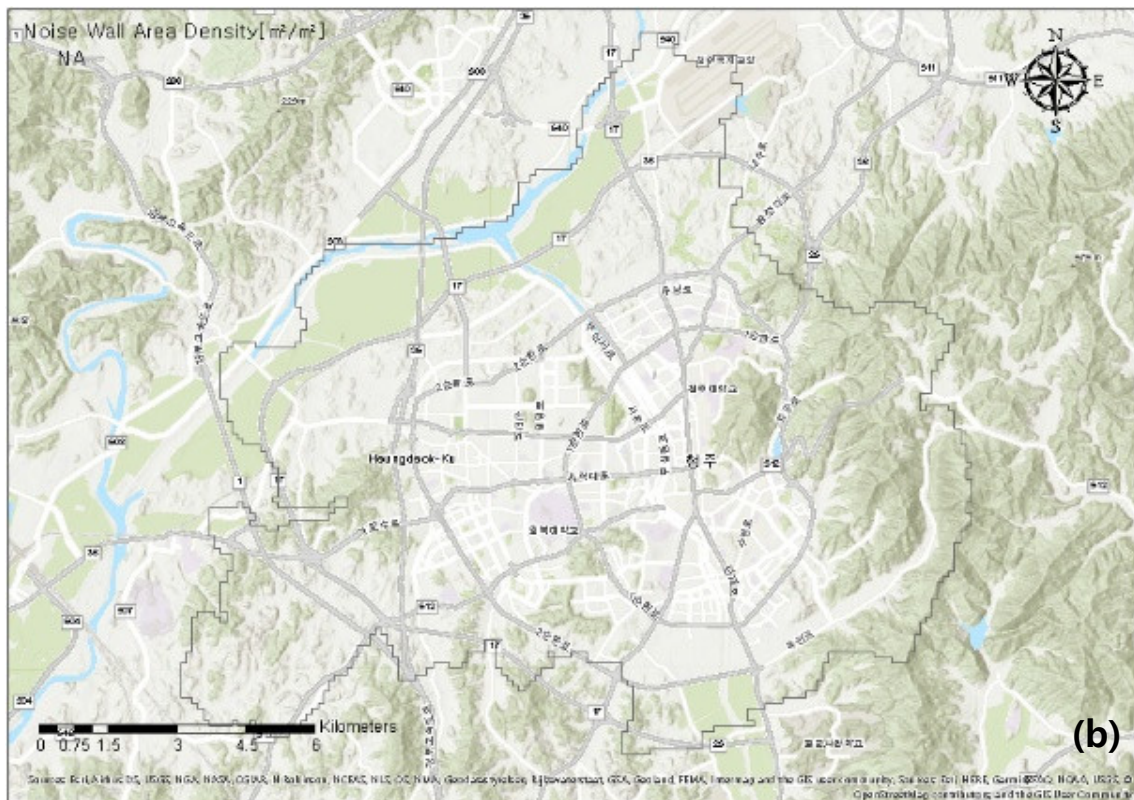

33

Figure S10. Grid maps of representative values for noise barrier density in: (a) Gwangju; (b) Cheongju [44-45].

34

35



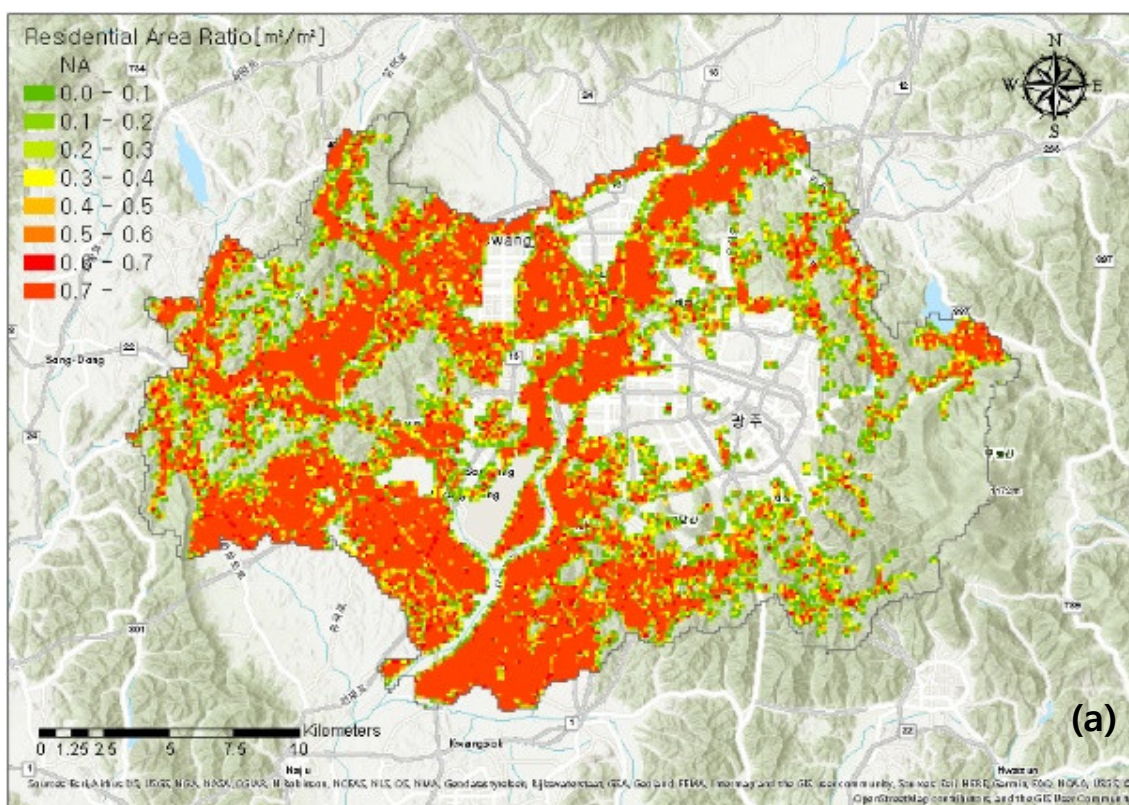

36

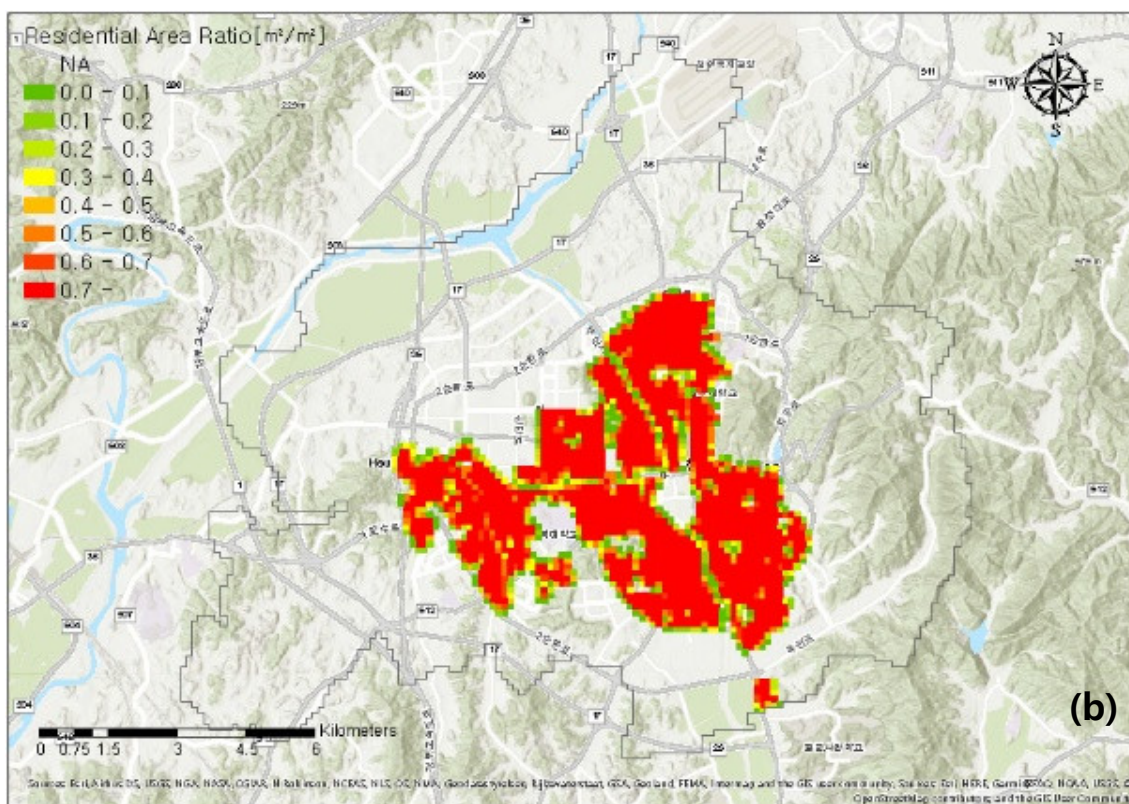

37

Figure S11. Grid maps of representative values for fraction of residential area in: (a) Gwangju; (b) Cheongju [44-45].

38



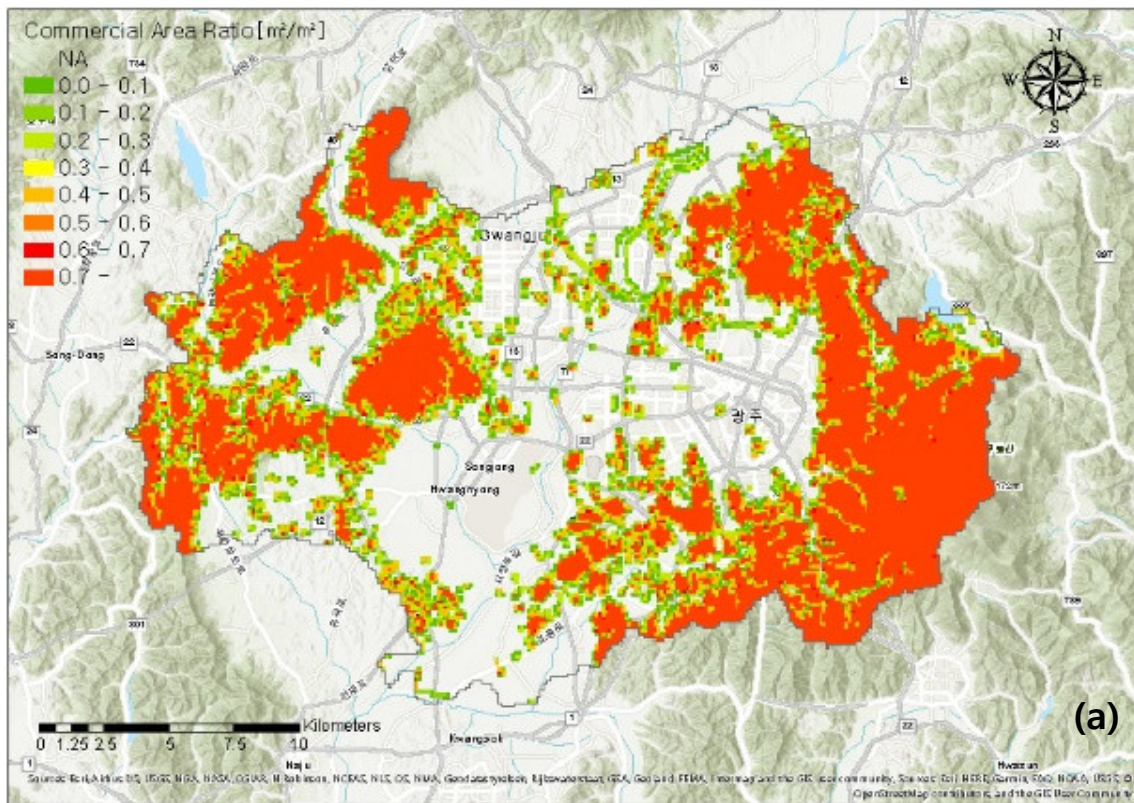

39

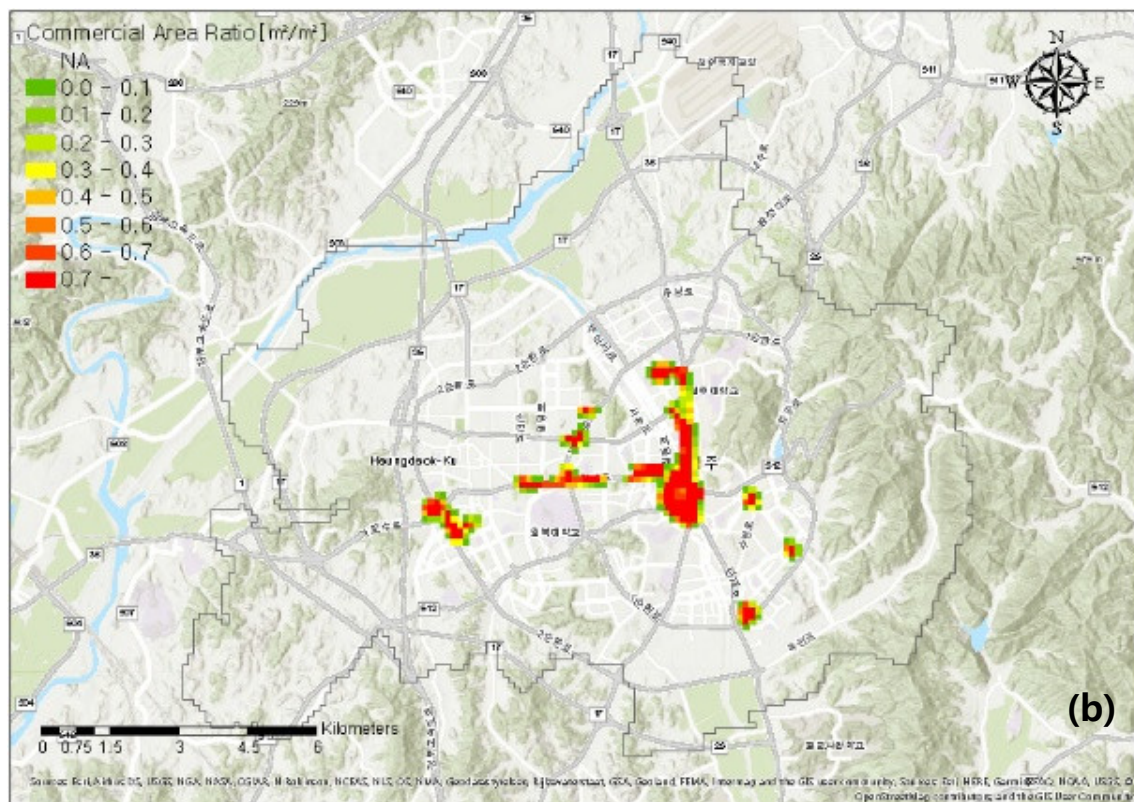

40

Figure S12. Grid maps of representative values for fraction of commercial area in: (a) Gwangju; (b) Cheongju [44-45].

41



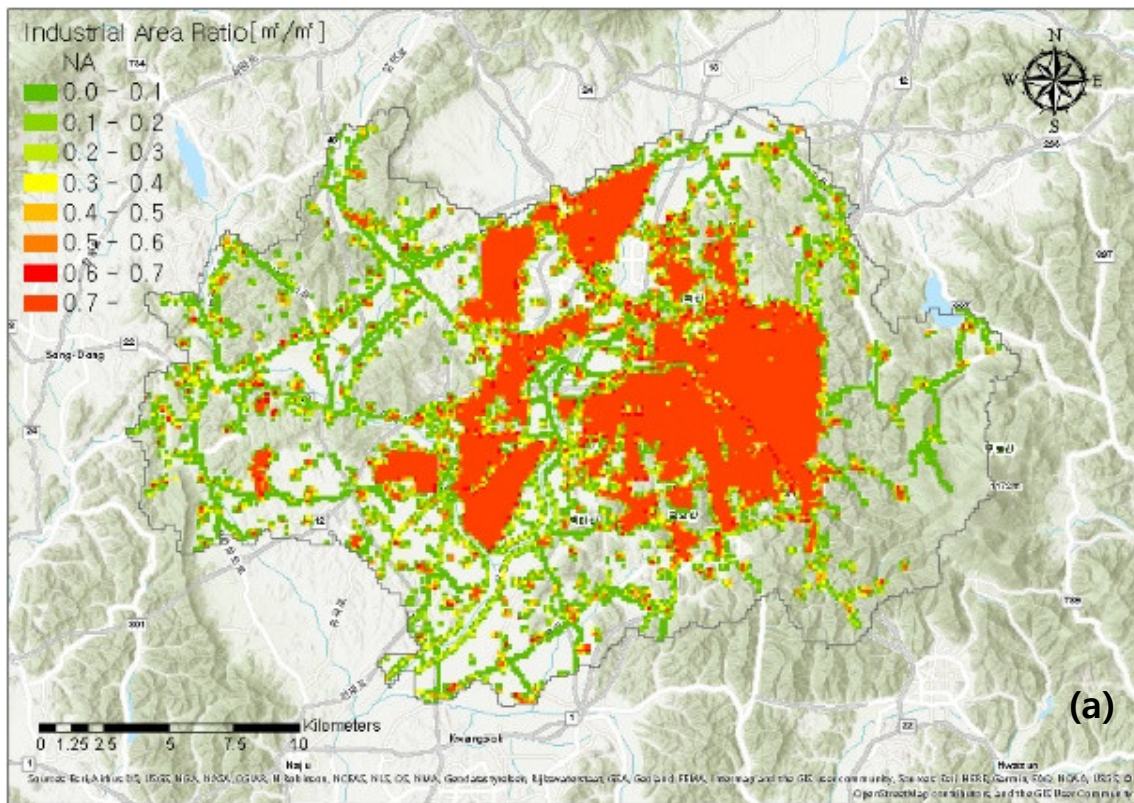

42

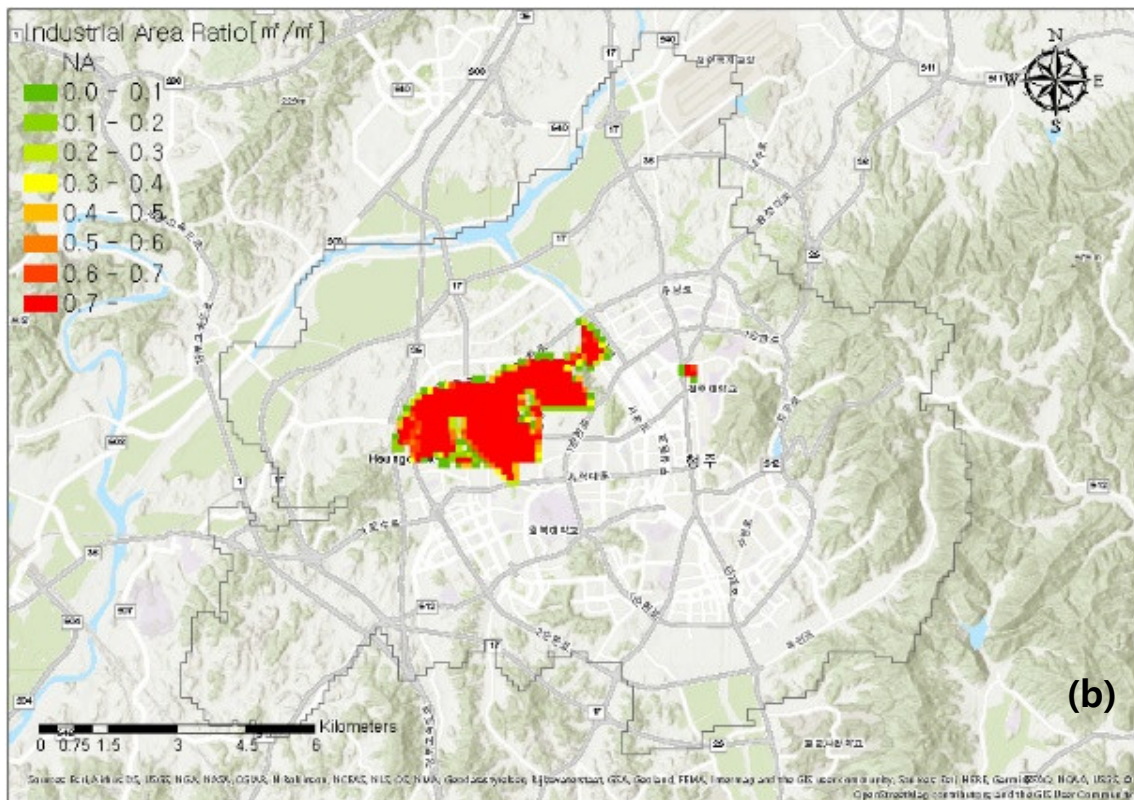

43

Figure S13. Grid maps of representative values for fraction of industrial area in: (a) Gwangju; (b) Cheongju [44-45].

44

45



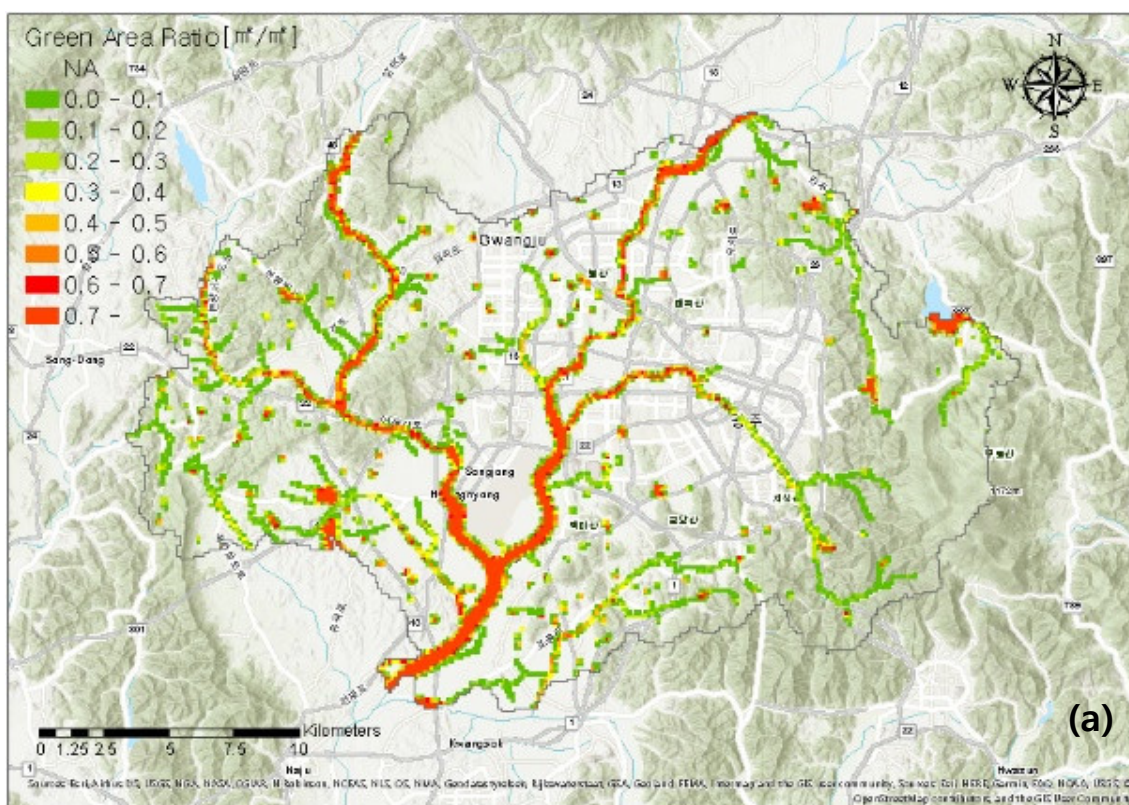

46

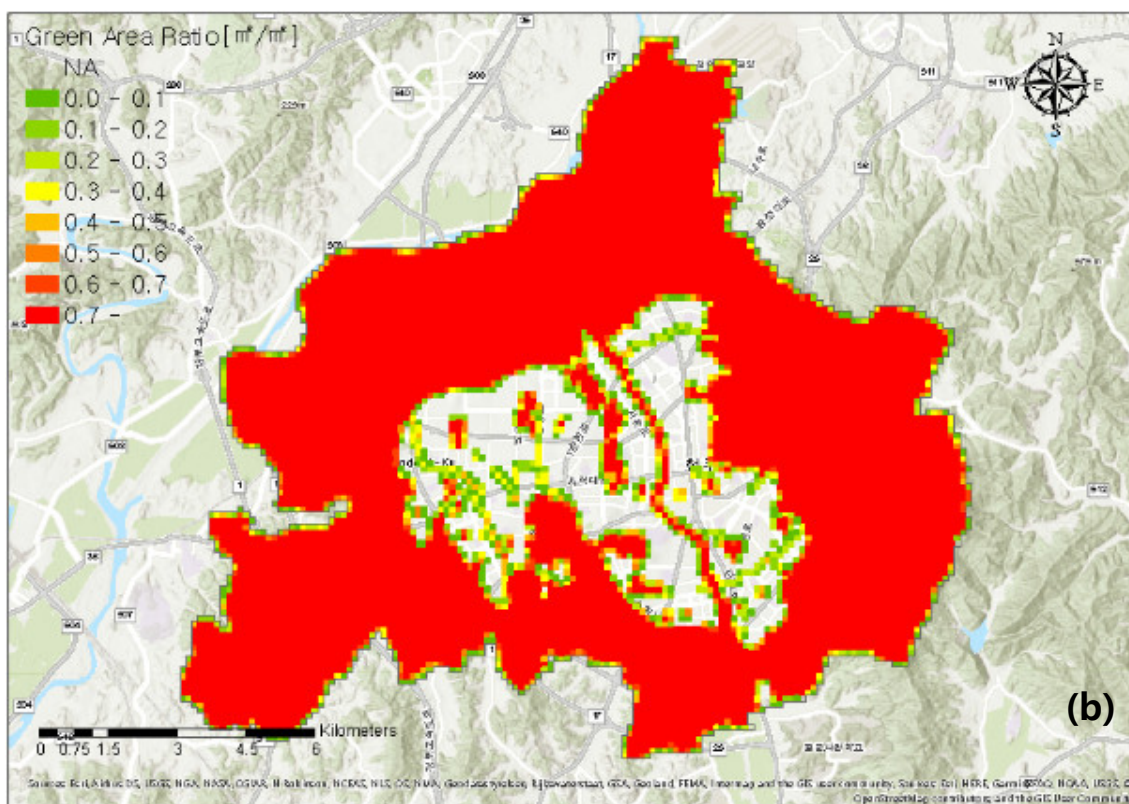

47

Figure S14. Grid maps of representative values for fraction of green area in: (a) Gwangju; (b) Cheongju [44-45].

48

49



Supplement B

50  
51

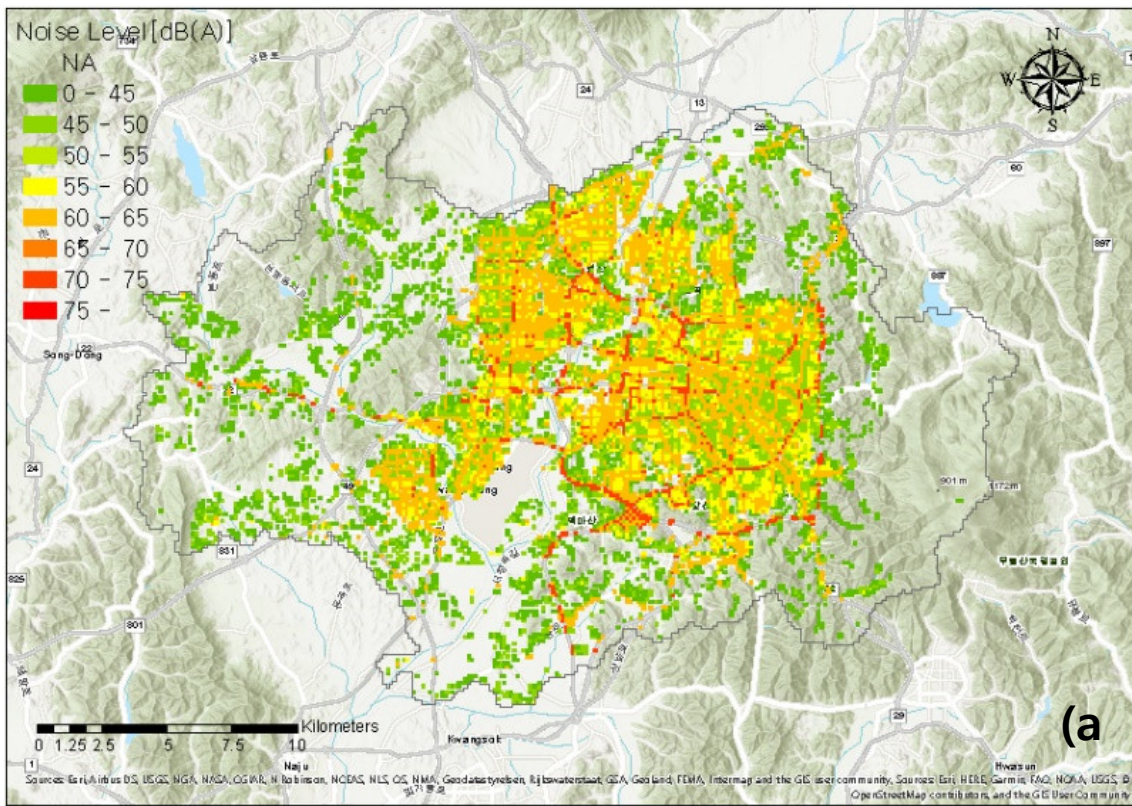

52

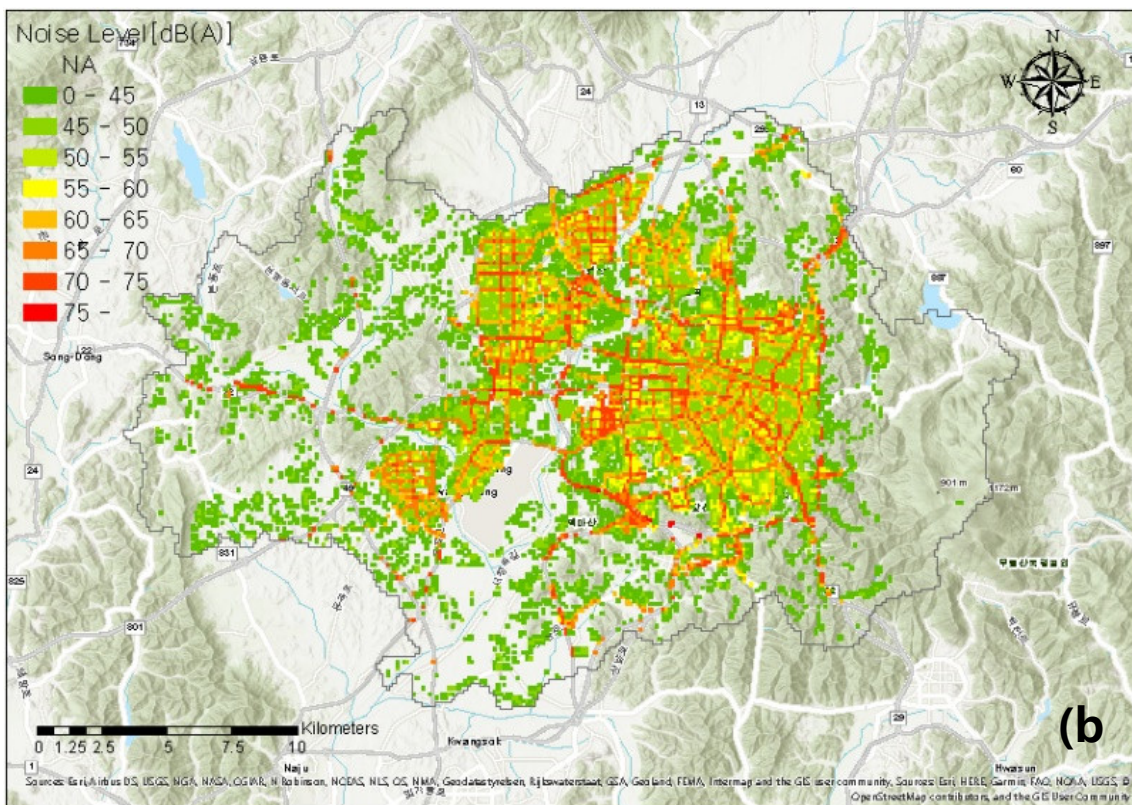

53

Figure S15. Statistical road-traffic noise maps of Gwangju: (a) ANN model; (b) OLS model [44-45].

54



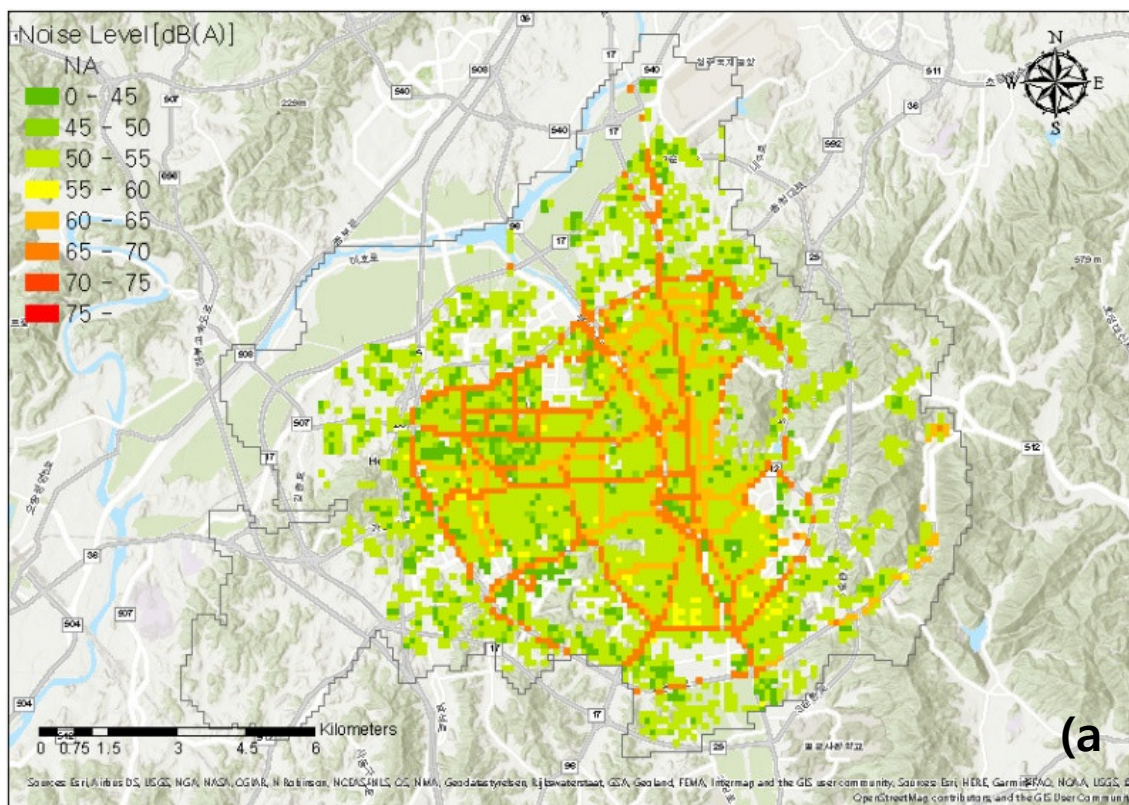

55

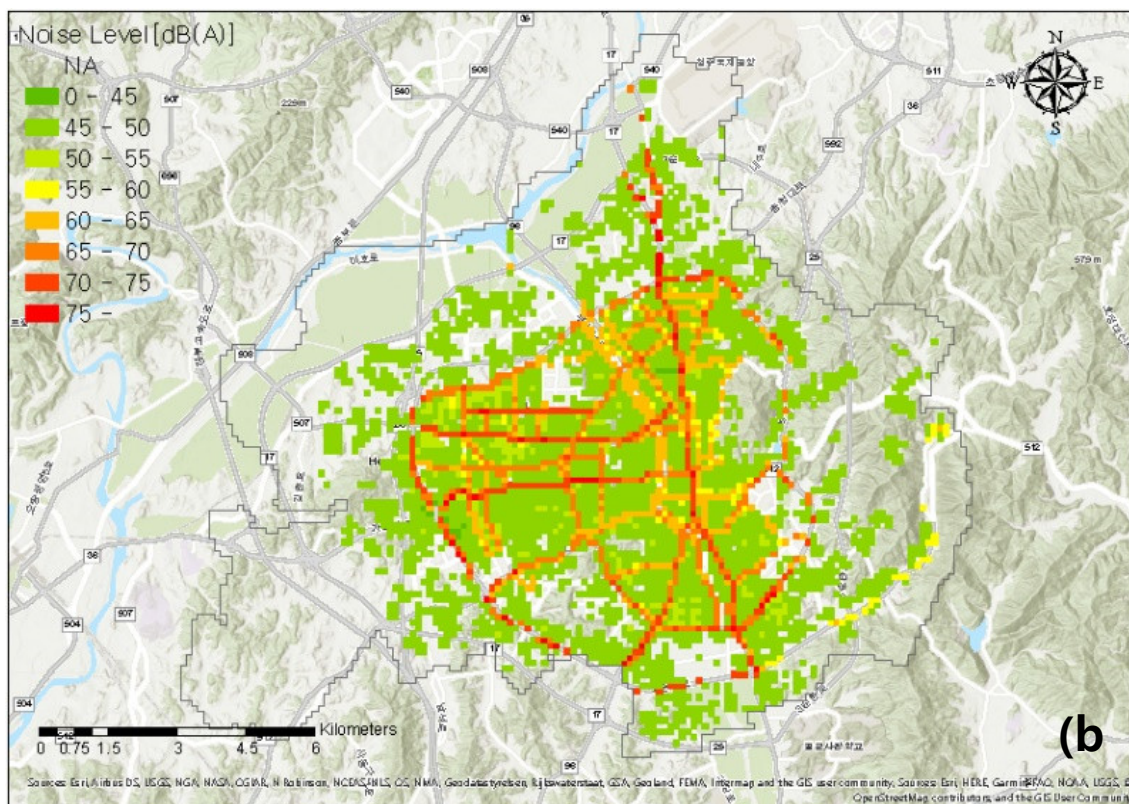

56

57

Figure S16. Statistical road-traffic noise map of Cheongju: (a) ANN model; (b) OLS model [44-45].
